# Supplementary material for: Fibrotic extracellular matrix activates a profibrotic positive feedback loop
Source: JCI journal article supplement (doi:10.1172/jci71386), 2014-03-03
Supplement: sd1 [file 1]

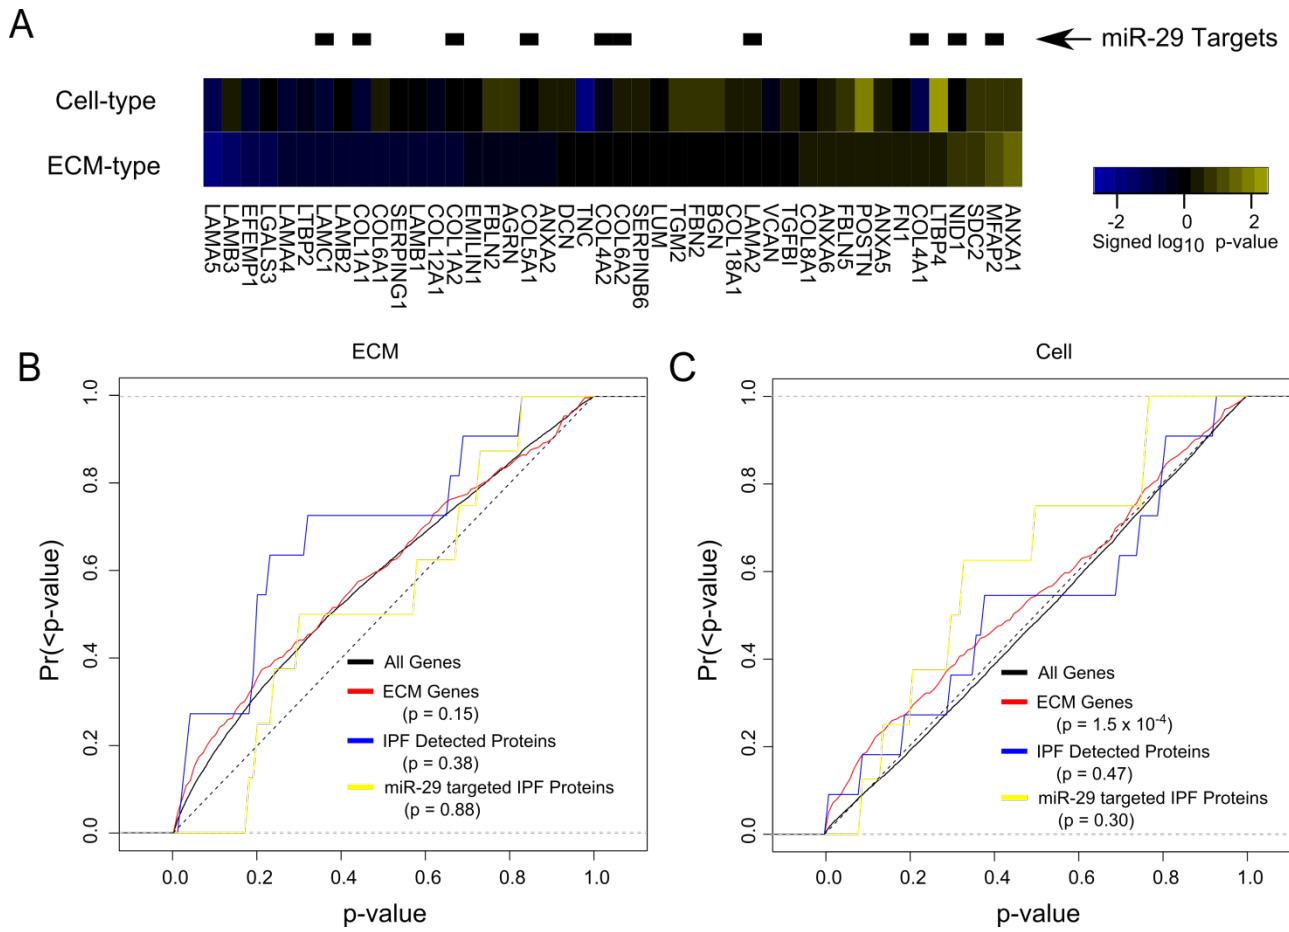

**Figure S1 – Steady-state RNA levels of genes detected in the IPF lung.** (A) Significance of genes (in ECM comparison) that are expressed in the IPF lung. (B-C) Cumulative p-value probability distributions are shown. The dotted line is the theoretical null distribution. The black line represents all genes except ECM region genes. The red line represents all ECM genes except those detected in the IPF lung (KS p-value for comparison to “All Genes”). The blue line represents all genes from the IPF lung except miRNA-29 targets (KS p-value for comparison to “ECM Genes”). The yellow line represents all IPF-detected miRNA-29 targets (KS p-value for comparison to “IPF Detected Proteins”).

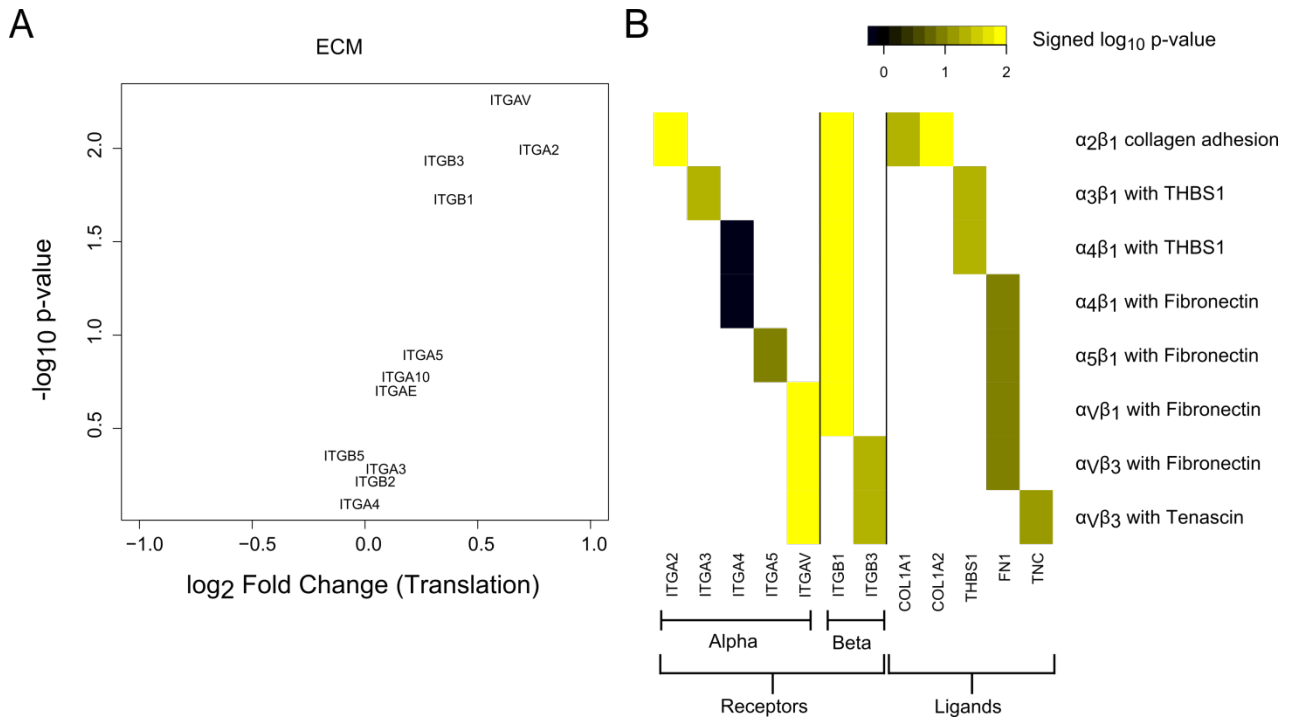

**Figure S2 – Diseased ECM coordinately activates translation of integrin receptors and their ligands.** (A) Volcano plot of changes due to IPF ECM of all detected integrins. (B) Heatmap of all annotated integrin binding reactions where both binding partners and the ligand were detected. On the left is the translational activation of the  $\alpha$  integrin on IPF ECM. In the center is the translational activation of the  $\beta$  integrin. On the right is the translational activation of their cognate ligand(s).

***ATTACHED***

**Table S1 – Genes significantly altered in polysome-associated RNA level on IPF ECM relative to control ECM.**

ECM-regulated Translation Gene Ontologies:

|            | Ontology Name                               | Odds Ratio | p-value               |
|------------|---------------------------------------------|------------|-----------------------|
| GO:0071230 | cellular response to amino acid stimulus    | 17.52      | $2.67 \times 10^{-4}$ |
| GO:0022617 | extracellular matrix disassembly            | 14.33      | $1.37 \times 10^{-3}$ |
| GO:0031012 | extracellular matrix                        | 3.44       | $2.96 \times 10^{-3}$ |
| GO:0005201 | extracellular matrix structural constituent | 5.14       | $3.99 \times 10^{-3}$ |
| GO:0016525 | negative regulation of angiogenesis         | 11.26      | $6.65 \times 10^{-3}$ |
| GO:0030199 | collagen fibril organization                | 11.26      | $6.65 \times 10^{-3}$ |
| GO:0007411 | axon guidance                               | 3.36       | $8.65 \times 10^{-3}$ |
| GO:0005509 | calcium ion binding                         | 2.84       | $8.77 \times 10^{-3}$ |

Co-regulated Translation Gene Ontologies:

|            | Ontology Name                         | Odds Ratio | p-value               |
|------------|---------------------------------------|------------|-----------------------|
| GO:0031012 | extracellular matrix                  | 6.39       | $5.04 \times 10^{-4}$ |
| GO:0042383 | sarcolemma                            | 26.75      | $1.68 \times 10^{-3}$ |
| GO:0060041 | retina development in camera-type eye | Inf        | $3.36 \times 10^{-3}$ |
| GO:0005507 | copper ion binding                    | 13.43      | $5.43 \times 10^{-3}$ |
| GO:0005198 | structural molecule activity          | 10.75      | $8.35 \times 10^{-3}$ |
| GO:0007528 | neuromuscular junction development    | 33.82      | $9.72 \times 10^{-3}$ |

ECM-regulated Steady-state Gene Ontologies:

|            | Ontology Name                   | Odds Ratio | p-value               |
|------------|---------------------------------|------------|-----------------------|
| GO:0006954 | inflammatory response           | 4.95       | $3.65 \times 10^{-3}$ |
| GO:0016266 | O-glycan processing             | 9.83       | $6.04 \times 10^{-3}$ |
| GO:0043200 | response to amino acid stimulus | 21.64      | $7.05 \times 10^{-3}$ |

Co-regulated Steady-state Gene Ontologies:

|            | Ontology Name             | Odds Ratio | p-value               |
|------------|---------------------------|------------|-----------------------|
| GO:0005539 | glycosaminoglycan binding | Inf        | $5.76 \times 10^{-4}$ |

Table S2 – Gene ontologies over-represented in the ECM-regulated and co-regulated subgroups of the translation and steady-state RNA profiles (see Figure 4)
